# Supplementary material for: Nuclear localization of platelet-activating factor receptor controls retinal neovascularization
Source: PubMed Central journal article supplement (PMC4941644; doi:10.1038/celldisc.2016.17), 2016-07-12
Supplement: celldisc201617-s5.pdf [file celldisc201617-s5.pdf]

## Supplemental Table-1 PTAFR Motifs and Mutagenesis

| PTAFR motif<br>(all motifs are present in C-terminus) |                                                                                                  | Ref. for the motif | Mutagenesis                                                                                                      | Ref. for the mutation |
|-------------------------------------------------------|--------------------------------------------------------------------------------------------------|--------------------|------------------------------------------------------------------------------------------------------------------|-----------------------|
| 1.                                                    | Monopartite nuclear localization signal (NLS)<br><br><sup>298</sup> KKFRKH <sup>302</sup>        | <sup>2</sup>       | <sup>298</sup> NNFRKH <sup>302</sup> i.e. first two lysine (K) residues were mutated to asparagine (N) residues. | <sup>3</sup>          |
| 2.                                                    | Putative internalization motif (last 26 amino acid residues) i.e. 317 to 342 amino acid residues | <sup>1</sup>       | 311stop PTAFR                                                                                                    | <sup>4</sup>          |
| 3.                                                    | Putative ER retention motif<br><br><sup>338</sup> NLSK <sup>341</sup>                            | <sup>2</sup>       | 330stop PTAFR                                                                                                    |                       |
