# Supplementary material for: Nuclear localization of platelet-activating factor receptor controls retinal neovascularization
Source: PubMed Central journal article supplement (PMC4941644; doi:10.1038/celldisc.2016.17), 2016-07-12
Supplement: celldisc201617-s6.pdf [file celldisc201617-s6.pdf]

## Supplemental Table-2 Primer sequences (Human genes)

|    | <b>Human Gene name</b>                                      | <b>symbol</b> | <b>Primer sequence (5'-3')</b>                                                                | <b>Ref</b> |
|----|-------------------------------------------------------------|---------------|-----------------------------------------------------------------------------------------------|------------|
| 1. | glyceraldehyde-3-phosphate dehydrogenase                    | <i>GAPDH</i>  | Forward-<br>5'-CGGAGTCAACGGATTTGGTCGTAT-3'<br><br>Reverse-<br>5'-AGCCTTCTCCATGGTGGTGAAGAC-3'  | 5          |
| 2. | nitric oxide synthase 3 (endothelial nitric oxide synthase) | <i>NOS3</i>   | Forward-<br>5'-CCAGCTAGCCAAAGTCACCAT-3'<br><br>Reverse-<br>5'-GTCTCGGAGCCATACAGGATT-3'        | 6          |
| 3. | RAB11A, member RAS oncogene family                          | <i>RAB11A</i> | Forward-<br>5'-TTTTGCAGAGAAGAATGGTTTGTC-3'<br><br>Reverse-<br>5'-CCTTTGGCTTGTTCTCAGTGGT-3'    | 7          |
| 4. | importin 5 (karyopherin beta 3 & Ran binding protein 5)     | <i>IPO5</i>   | Forward-<br>5'-CTTTCCAGGACCCATGTGTAG-3'<br><br>Reverse-<br>5'-CTTTCCTCTGTTGAGTGCCG-3'         |            |
| 5. | vascular endothelial growth factor A                        | <i>VEGFA</i>  | Forward-<br>5'-ACGAAAGCGCAAGAAATCC-3'<br><br>Reverse-<br>5'-GGAGGCTCCAGGGCATTAG-3'            |            |
| 6. | interleukin 1, beta                                         | <i>IL1B</i>   | Forward-<br>5'-AAACAGATGAAGTGCTCCTTCCAGG-3'<br><br>Reverse-<br>5'-TGGAGAACACCACTTGTTGCTCCA-3' | 8          |
