# Supplementary material for: Nuclear localization of platelet-activating factor receptor controls retinal neovascularization
Source: PubMed Central journal article supplement (PMC4941644; doi:10.1038/celldisc.2016.17), 2016-07-12
Supplement: celldisc201617-s7.pdf [file celldisc201617-s7.pdf]

## Supplemental Table-3 Primer sequences (Rat genes)

| Rat Gene name |                                          | symbol        | Primer sequence (5'-3')                                                              | Ref |
|---------------|------------------------------------------|---------------|--------------------------------------------------------------------------------------|-----|
| 1.            | glyceraldehyde-3-phosphate dehydrogenase | <i>Gapdh</i>  | Forward-<br>5'-CCAGGGCTGCCTTCTCTTGT-3'<br><br>Reverse-<br>5'-CCAGCCTTCTCCATGGTGGT-3' |     |
| 2.            | vascular endothelial growth factor A     | <i>Vegfa</i>  | Forward-<br>5'-CAATGATGAAGCCCTGGAGT-3'<br><br>Reverse-<br>5'-AATGCTTTCTCCGCTCTGAA-3' | 9   |
| 3.            | thromboxane A synthase 1                 | <i>Tbxas1</i> | Forward-<br>5'-TCCTATAAGGGCAGGACACG-3'<br><br>Reverse-<br>5'-GCCAAGAGAACCACGGACAG-3' |     |
| 4.            | interleukin 1, beta                      | <i>Il1b</i>   | Forward-<br>5'-CATCTTTGAAGAAGAGCCCG-3'<br><br>Reverse-<br>5'-GGGATTTTGTCGTTGCTTGT-3' | 9   |
| 5.            | nitric oxide synthase 3                  | <i>Nos3</i>   | Forward-<br>5'-ATTGGCATGAGGGACCTGTG-3'<br><br>Reverse-<br>5'-CCGGGTGTCTAGATCCATGC-3' |     |

## Supplemental References:

- 1 Le Gouill C, Parent JL, Rola-Pleszczynski M, Stankova J. Structural and functional requirements for agonist-induced internalization of the human platelet-activating factor receptor. *J Biol Chem* 1997; **272**:21289-21295.
- 2 Marrache AM, Gobeil F, Jr., Bernier SG *et al.* Proinflammatory gene induction by platelet-activating factor mediated via its cognate nuclear receptor. *J Immunol* 2002; **169**:6474-6481.
- 3 Srinivasan M, Edman CF, Schulman H. Alternative splicing introduces a nuclear localization signal that targets multifunctional CaM kinase to the nucleus. *J Cell Biol* 1994; **126**:839-852.
- 4 Chen Z, Dupre DJ, Le Gouill C, Rola-Pleszczynski M, Stankova J. Agonist-induced internalization of the platelet-activating factor receptor is dependent on arrestins but independent of G-protein activation. Role of the C terminus and the (D/N)PXXY motif. *J Biol Chem* 2002; **277**:7356-7362.
- 5 Navone SE, Marfia G, Invernici G *et al.* Isolation and expansion of human and mouse brain microvascular endothelial cells. *Nat Protoc* 2013; **8**:1680-1693.
- 6 Teng B, Murthy KS, Kuemmerle JF *et al.* Expression of endothelial nitric oxide synthase in human and rabbit gastrointestinal smooth muscle cells. *Am J Physiol* 1998; **275**:G342-351.
- 7 Gebhardt C, Breitenbach U, Richter KH *et al.* c-Fos-dependent induction of the small ras-related GTPase Rab11a in skin carcinogenesis. *Am J Pathol* 2005; **167**:243-253.
- 8 Keita M, Bessette P, Pelmus M, Ainmelk Y, Aris A. Expression of interleukin-1 (IL-1) ligands system in the most common endometriosis-associated ovarian cancer subtypes. *Journal of ovarian research* 2010; **3**:3.
- 9 Rivera JC, Sitaras N, Noueihed B *et al.* Microglia and interleukin-1beta in ischemic retinopathy elicit microvascular degeneration through neuronal semaphorin-3A. *Arterioscler Thromb Vasc Biol* 2013; **33**:1881-1891.
